# Supplementary material for: Robust stochastic Turing patterns in the development of a one-dimensional cyanobacterial organism
Source: PubMed Central journal article supplement (PMC5955598; doi:10.1371/journal.pbio.2004877), 2018-05-04

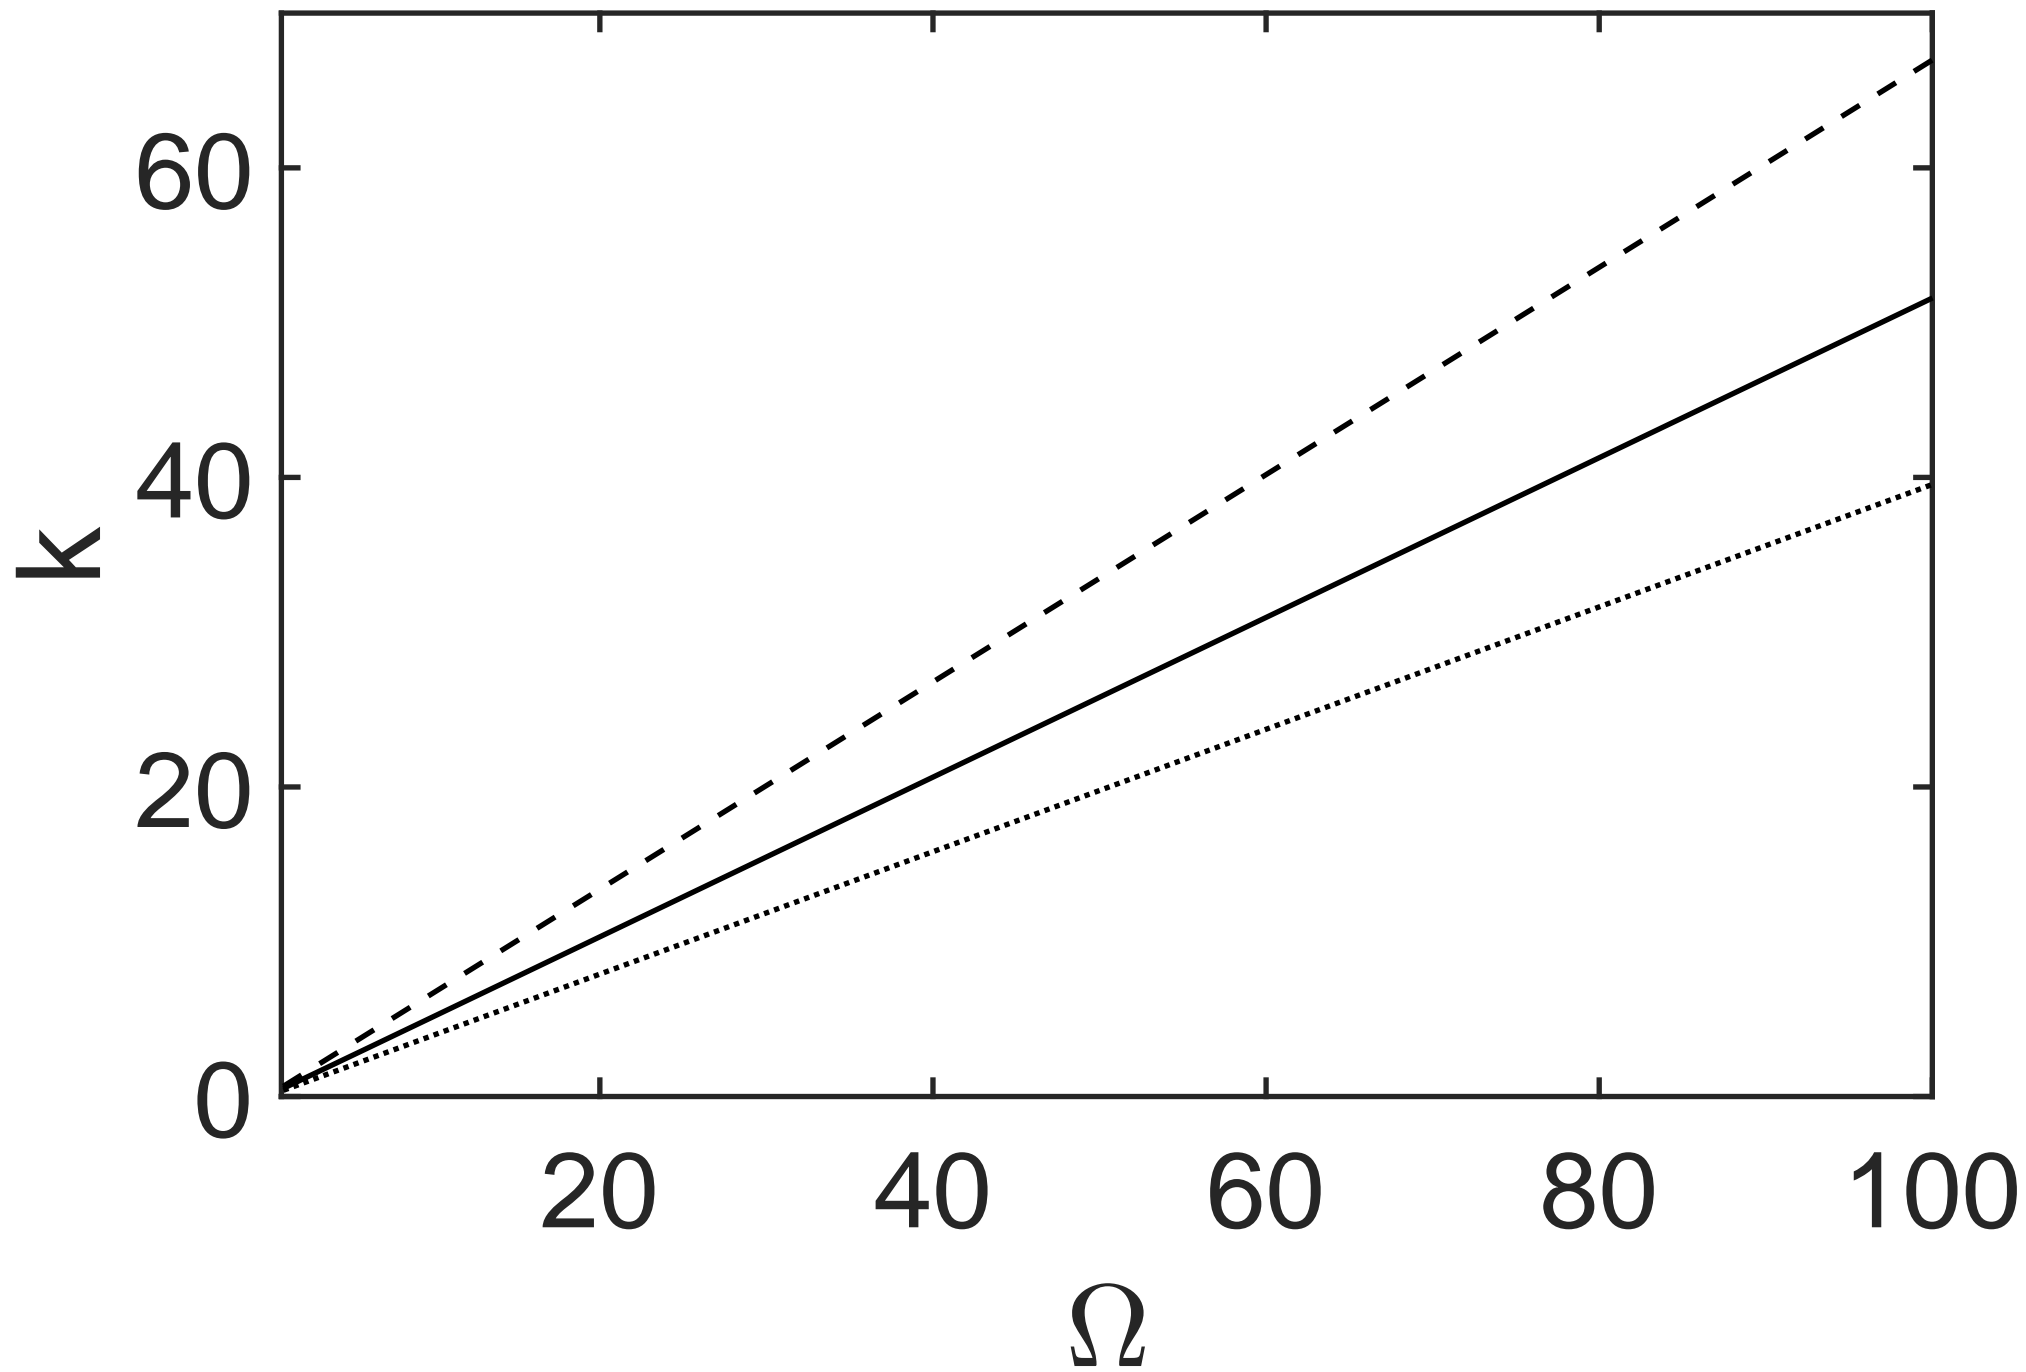

Supplement: pbio.2004877.s004.pdf [file pbio.2004877.s004.pdf]
